# Supplementary material
Source: PubMed Central journal article supplement (PMC2976561)

Supplementary Material for Tetrahedron Letters.

## Oxidative Degradation of Reducing Carbohydrates to Ammonium Formate with H<sub>2</sub>O<sub>2</sub> and NH<sub>4</sub>OH

Prasanna Pullanikat,<sup>a</sup> Sangmook J. Jung,<sup>a</sup> Kyung Soo Yoo<sup>a</sup> and Kyung Woon Jung<sup>\*a</sup>

<sup>a</sup> Loker Hydrocarbon Research Institute and Department of Chemistry, University of Southern California, Los Angeles, CA 90089, USA

### Details of experiment, NMR spectra.

All the experiments were run in 10 mL vials. Aqueous H<sub>2</sub>O<sub>2</sub> (30%) solution was purchased from Mallinckrodt Chemicals and aqueous NH<sub>4</sub>OH (25%) solution used was from EMD. MeOH was used as standard to calculate percentage yields. 1,3-Dihydroxyacetone dimer, D-(+)-galactose, D-(+)-cellobiose, D-(+)-xylose,  $\alpha$ -D-lactose, D-(+)-maltose monohydrate, D-erythrose, D-(+)-melezitose, D-(+)-raffinose were purchased from Alfa Aesar, D-glucose was from Mallinckrodt chemicals and sucrose was purchased from JT Baker. Wet NMR spectra were recorded on Varian Mercury 400 NMR spectroscopy using water and D<sub>2</sub>O mixture as solvent. Known mixture of methanol (1 or 2  $\mu$ L) in water was prepared and used for formic acid percentage calculations. Finnpiquette or Hamilton chromatography syringe was used to measure the solvents.

### <sup>1</sup>H wet 1D NMR of entry 1, Table 1

Glucose (5mg, 0.028 mmole), 130  $\mu$ L H<sub>2</sub>O<sub>2</sub> and 10  $\mu$ L NH<sub>4</sub>OH at rt for 1 hr; 1  $\mu$ L of MeOH as standard was used for NMR. Formic acid observed was 17 %.

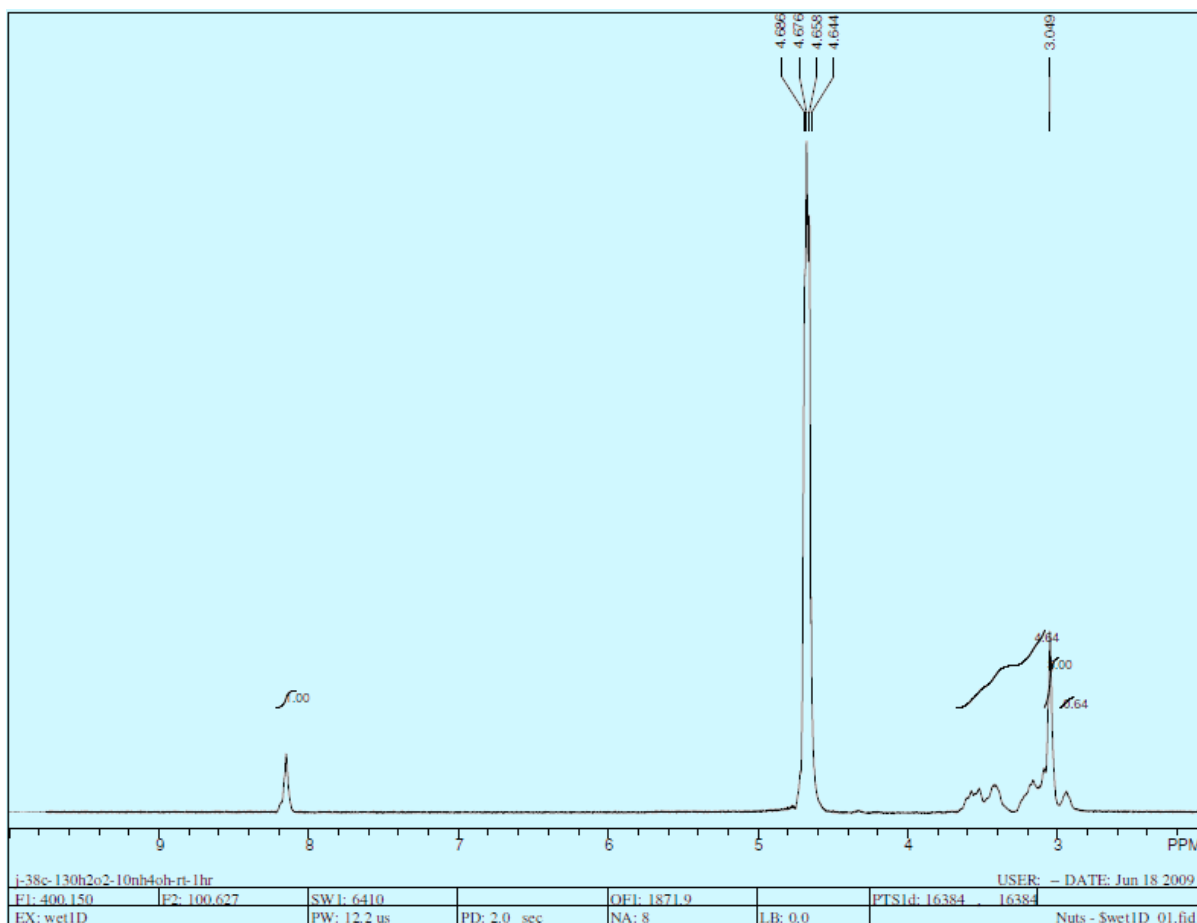

# <sup>1</sup>H wet 1D NMR of entry 2, Table 1

Glucose (5mg, 0.028 mmole), 130 μL H<sub>2</sub>O<sub>2</sub> and 30 μL NH<sub>4</sub>OH at rt for 1 hr; 1 μL of MeOH as standard was used for NMR. Formic acid observed was 41 %.

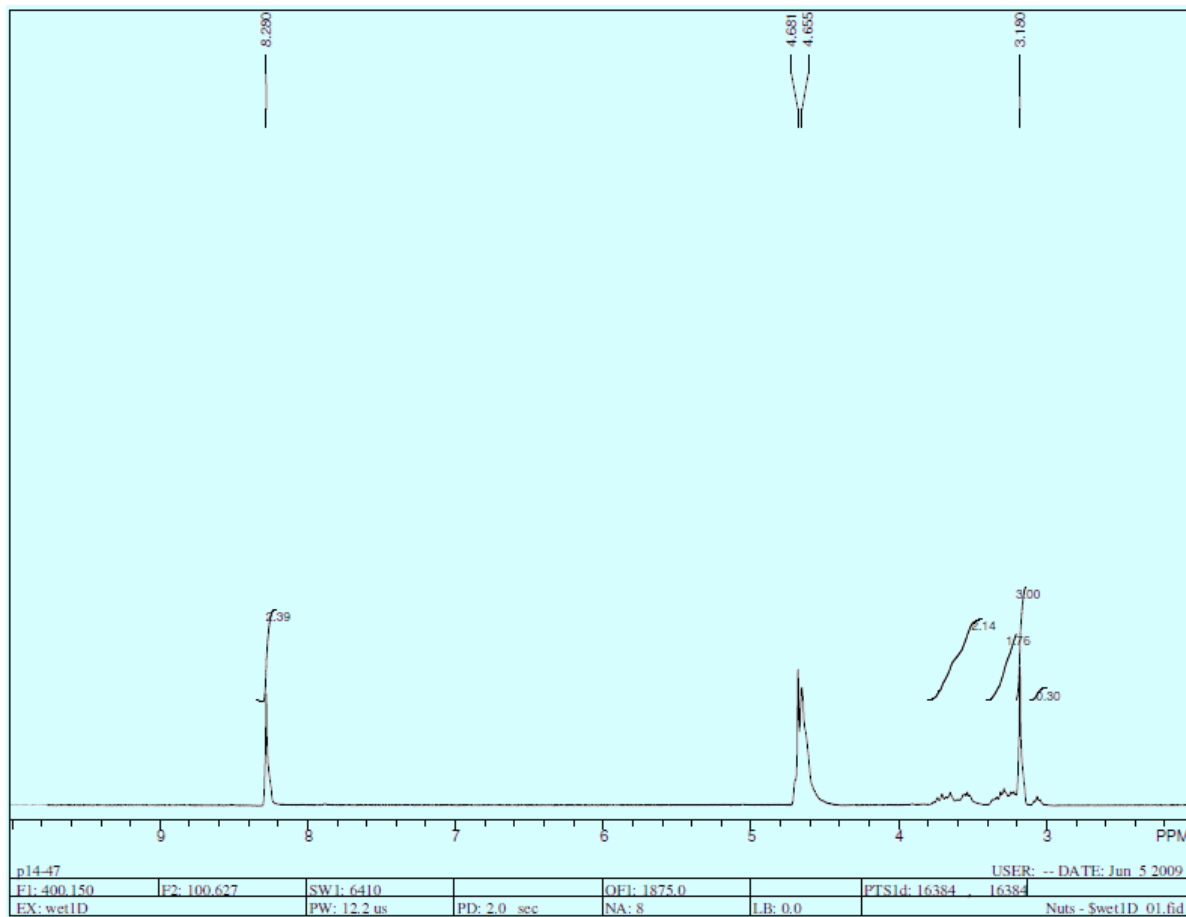

### <sup>1</sup>H wet 1D NMR of entry 3, Table 1

Glucose (5mg, 0.028 mmole), 150  $\mu$ L H<sub>2</sub>O<sub>2</sub> and 5  $\mu$ L NH<sub>4</sub>OH at rt for 1 hr; 2  $\mu$ L of MeOH as standard was used for NMR. Formic acid observed was 23 %.

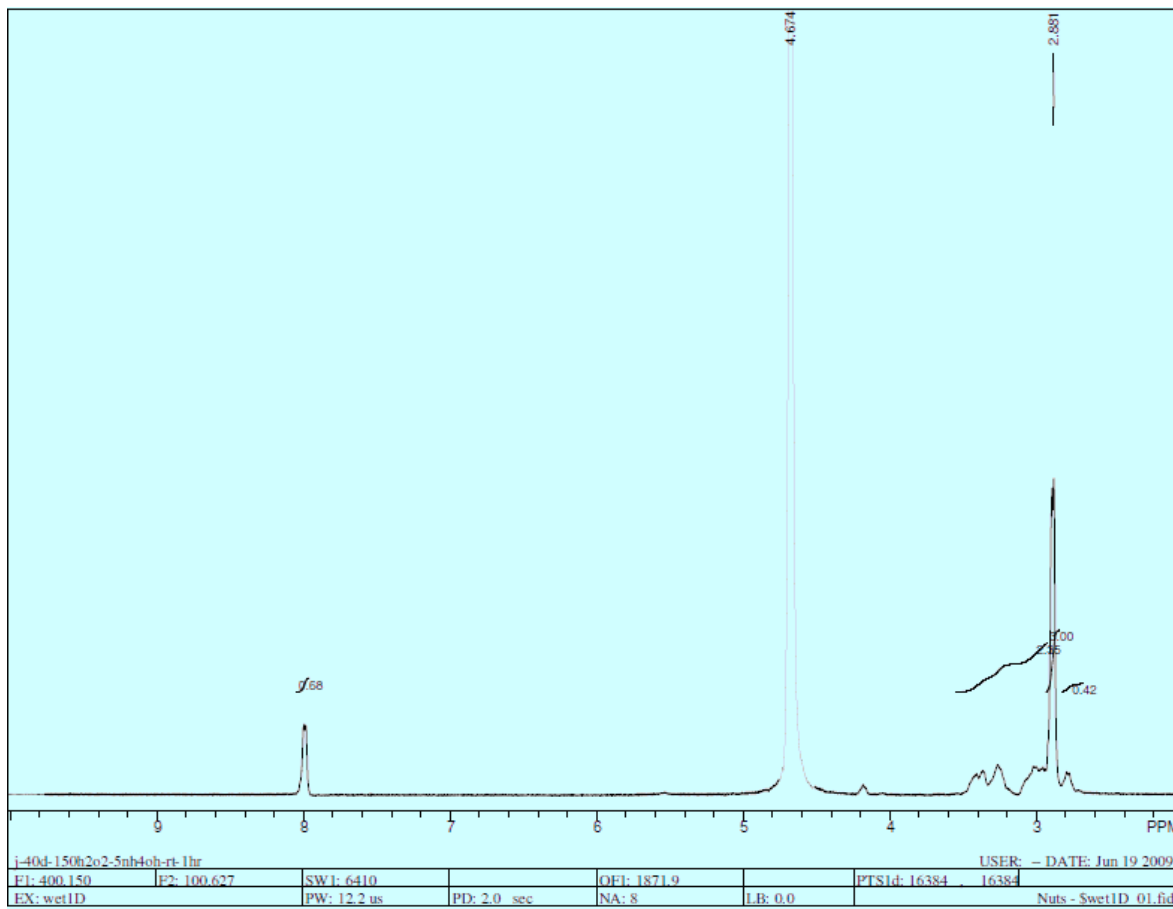

### <sup>1</sup>H wet 1D NMR of entry 4, Table 1.

Glucose (5mg, 0.028 mmole), 150  $\mu$ L H<sub>2</sub>O<sub>2</sub> and 10  $\mu$ L NH<sub>4</sub>OH at rt for 1 hr; 2  $\mu$ L of MeOH as standard was used for NMR. Formic acid observed was 44 %.

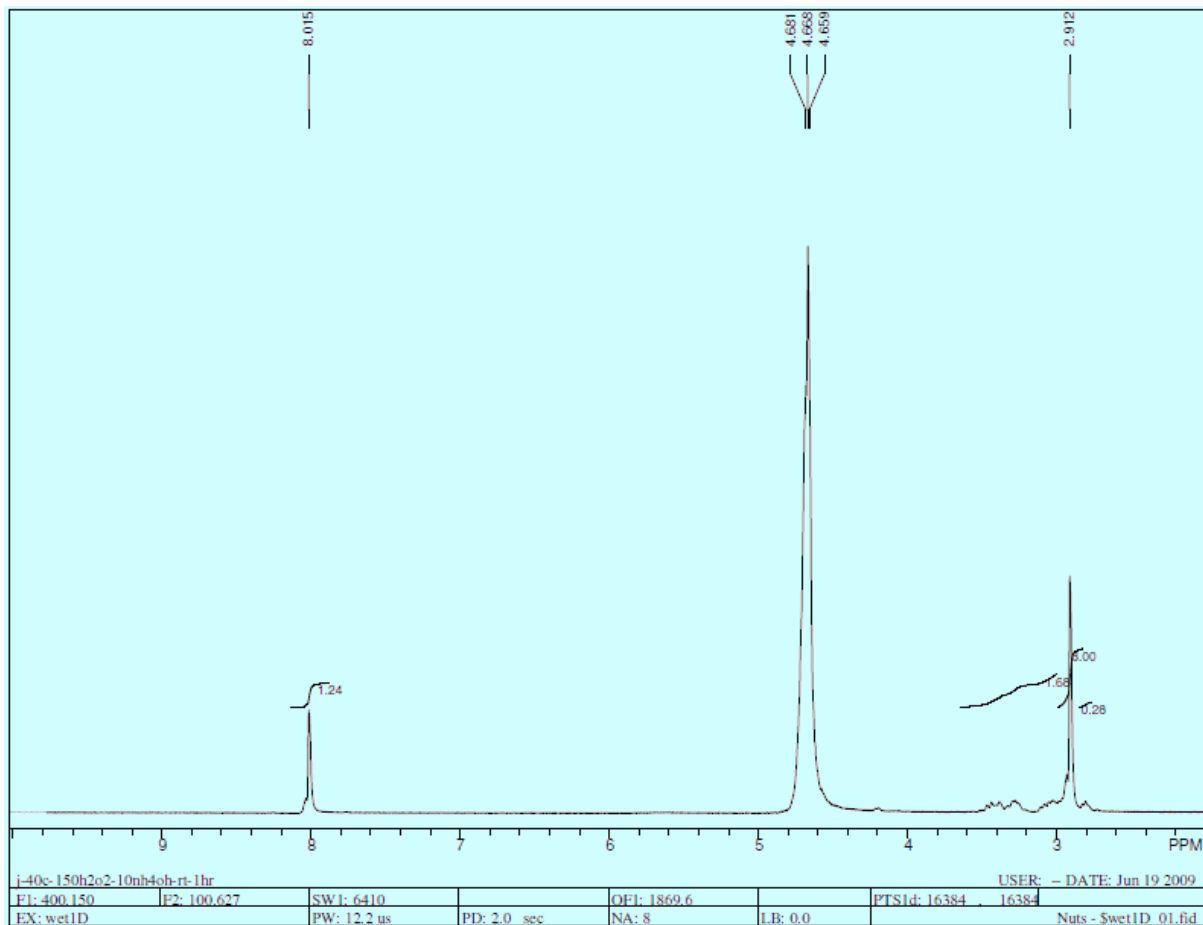

# <sup>1</sup>H wet 1D NMR of entry 5, Table 1 and entry 4, Table 2

Glucose (5mg, 0.028 mmole), 150  $\mu$ L H<sub>2</sub>O<sub>2</sub> and 30  $\mu$ L NH<sub>4</sub>OH at rt for 1 hr; 1  $\mu$ L of MeOH as standard was used for NMR. Formic acid observed was 99 %.

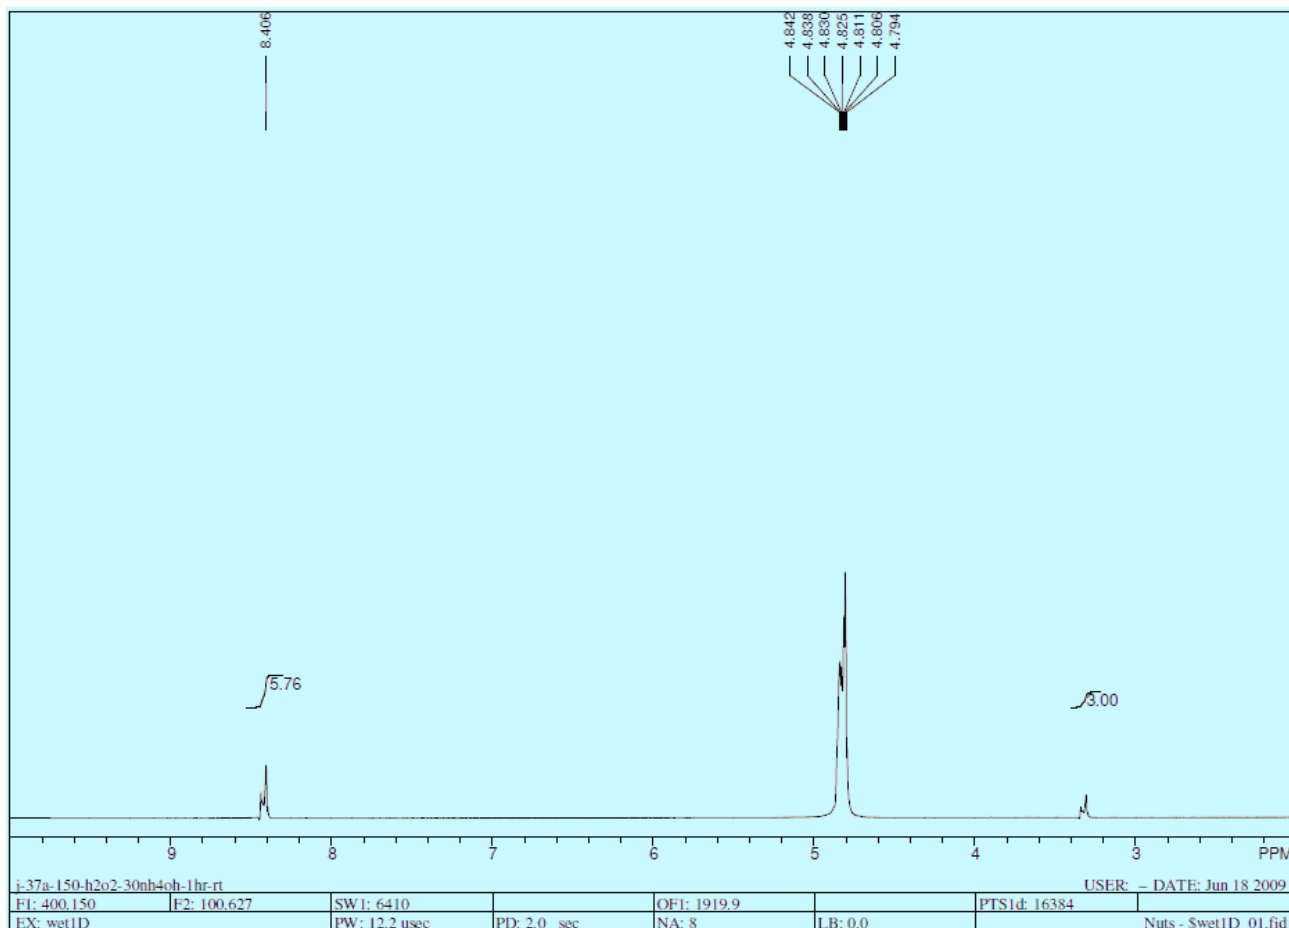

### <sup>1</sup>H wet 1D NMR of entry 6, Table 1

Glucose (5mg, 0.028 mmole), 300  $\mu$ L H<sub>2</sub>O<sub>2</sub> and without NH<sub>4</sub>OH at rt for 1 hr; 1  $\mu$ L of MeOH as standard was used for NMR. Formic acid observed was 0%.

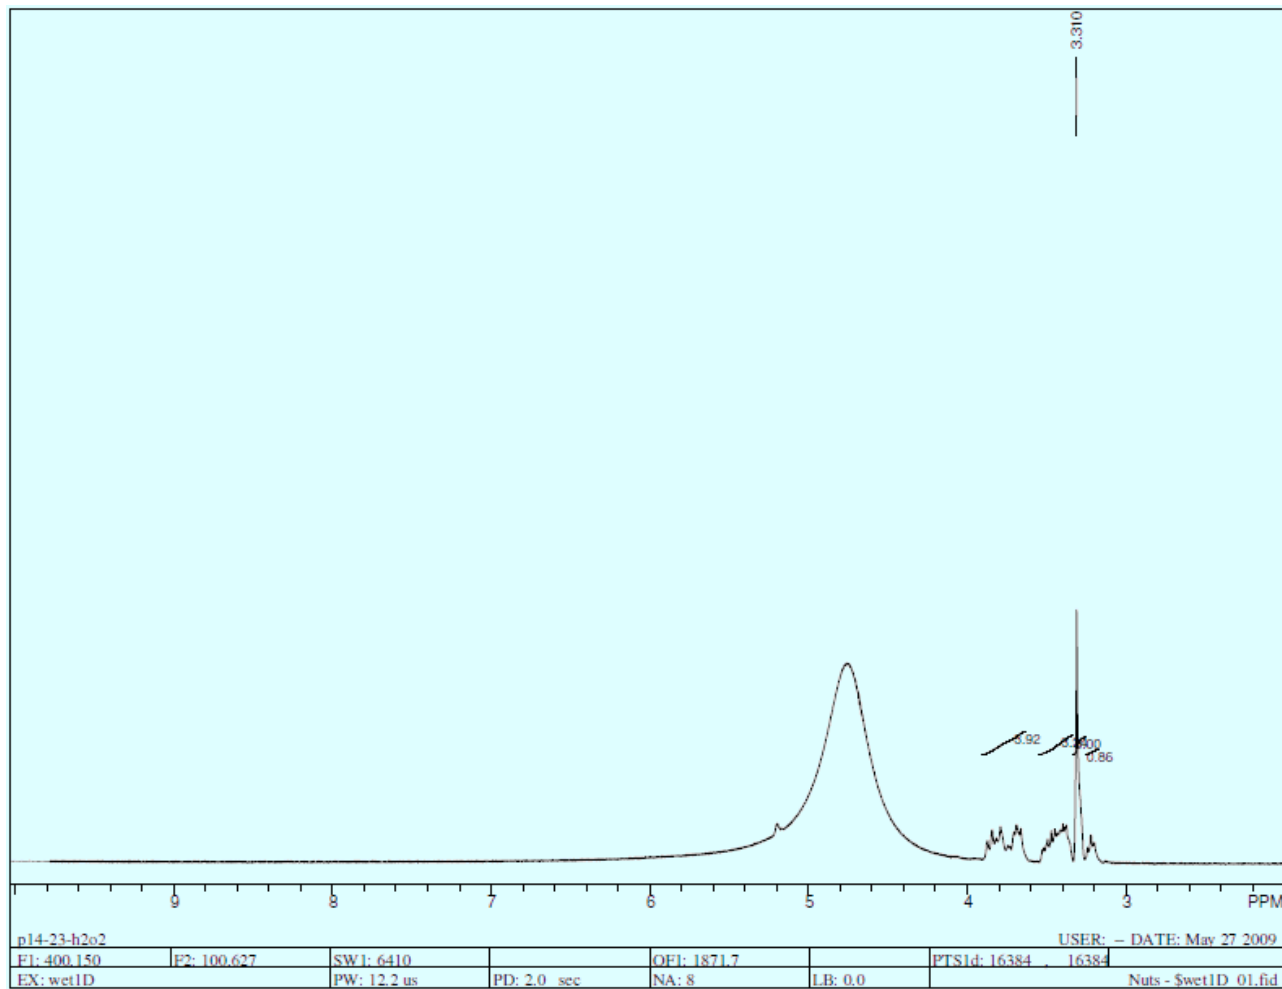

# <sup>1</sup>H wet 1D NMR of entry 7, Table 1

Glucose (5mg, 0.028 mmole), 300  $\mu$ L H<sub>2</sub>O<sub>2</sub> and 30  $\mu$ L NH<sub>4</sub>OH at rt for 24 hr; 2  $\mu$ L of MeOH as standard was used for NMR. Formic acid observed was 99%.

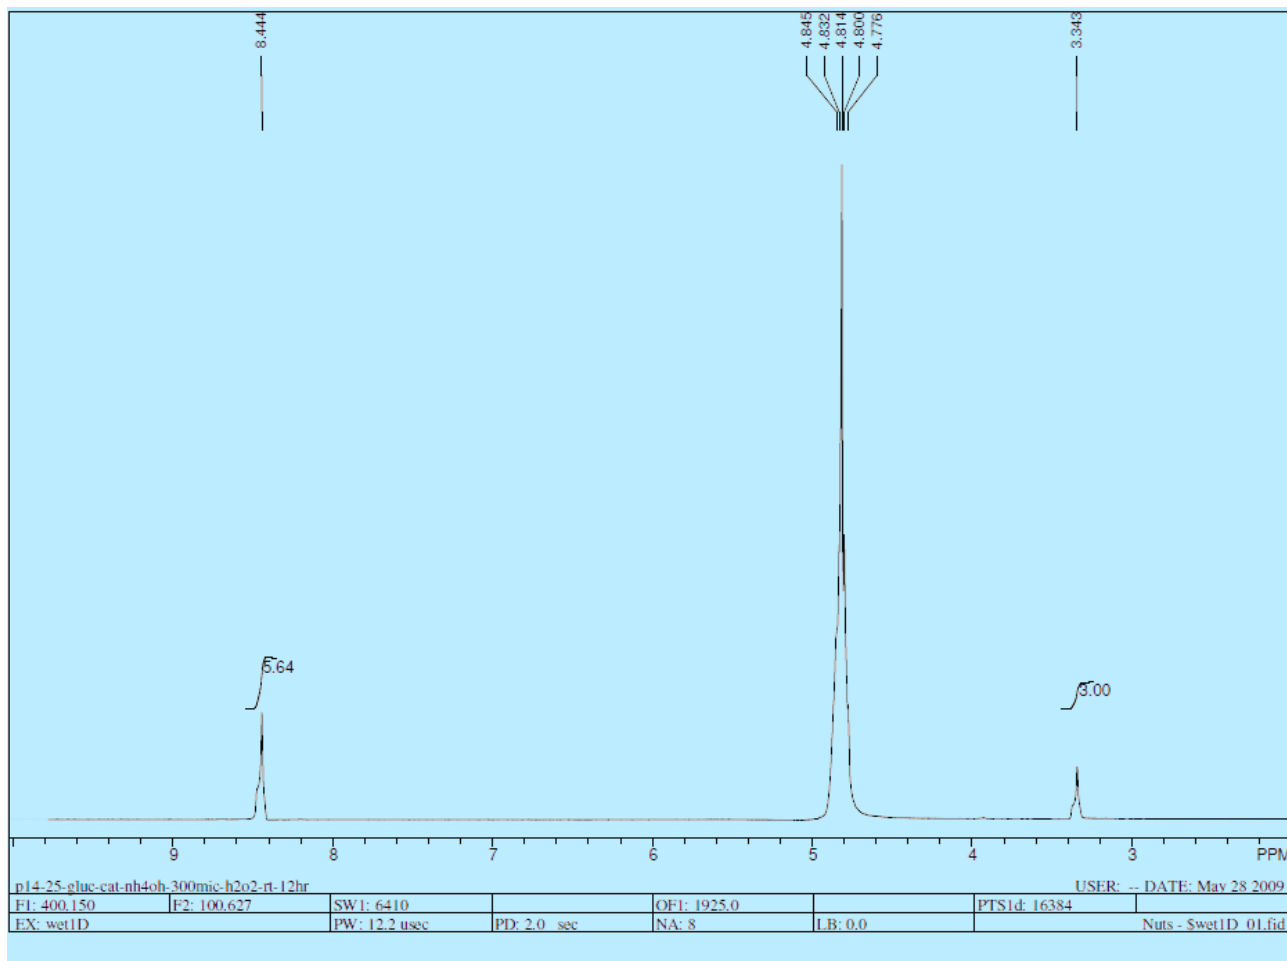

# <sup>13</sup>C NMR of entry 7, Table 1

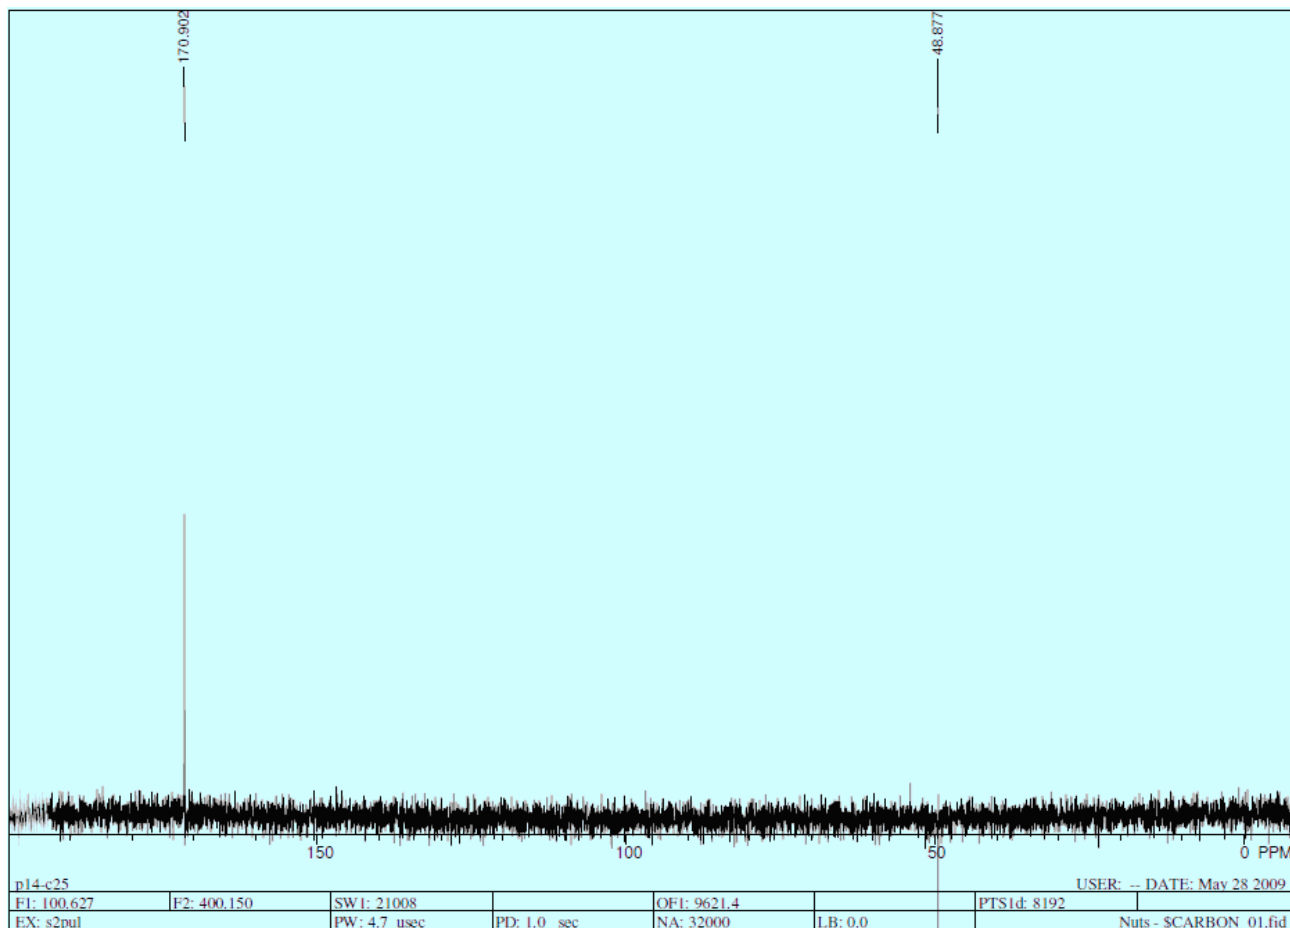



# <sup>1</sup>H wet 1D NMR of entry 1, Table 2

Erythrose (0.042 mmol), 150  $\mu$ L H<sub>2</sub>O<sub>2</sub> and 30  $\mu$ L NH<sub>4</sub>OH at rt for 1 hr; 2  $\mu$ L of MeOH as standard was used for NMR. Formic acid observed was 32%.

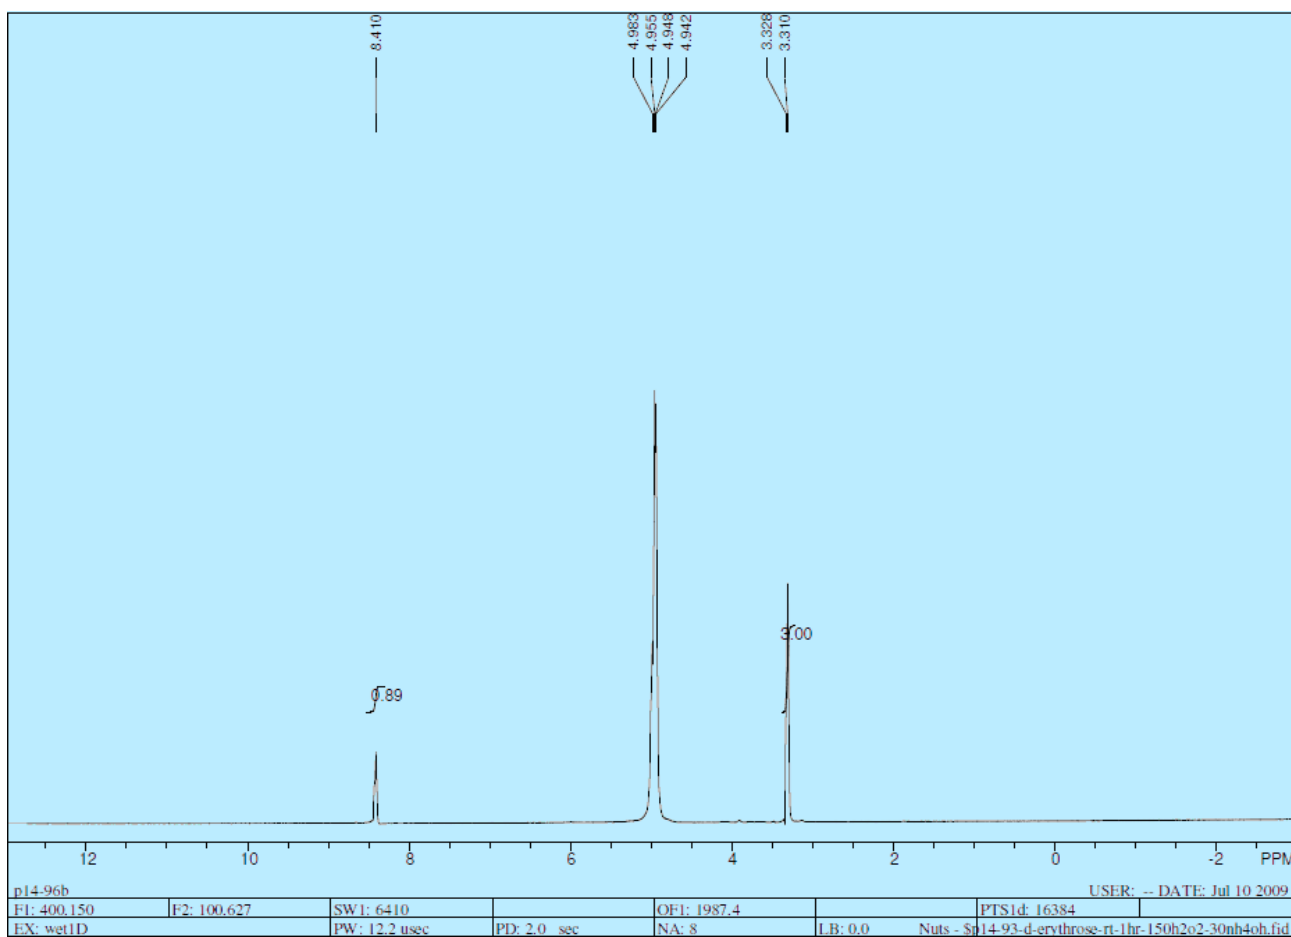

### <sup>1</sup>H wet 1D NMR of entry 2, Table 2.

Xylose (0.013 mmole (1hr) 150  $\mu$ L H<sub>2</sub>O<sub>2</sub> and 30  $\mu$ L NH<sub>4</sub>OH at RT for 1 hr; 2  $\mu$ L of MeOH as standard was used for NMR. Formic acid observed was 92%.

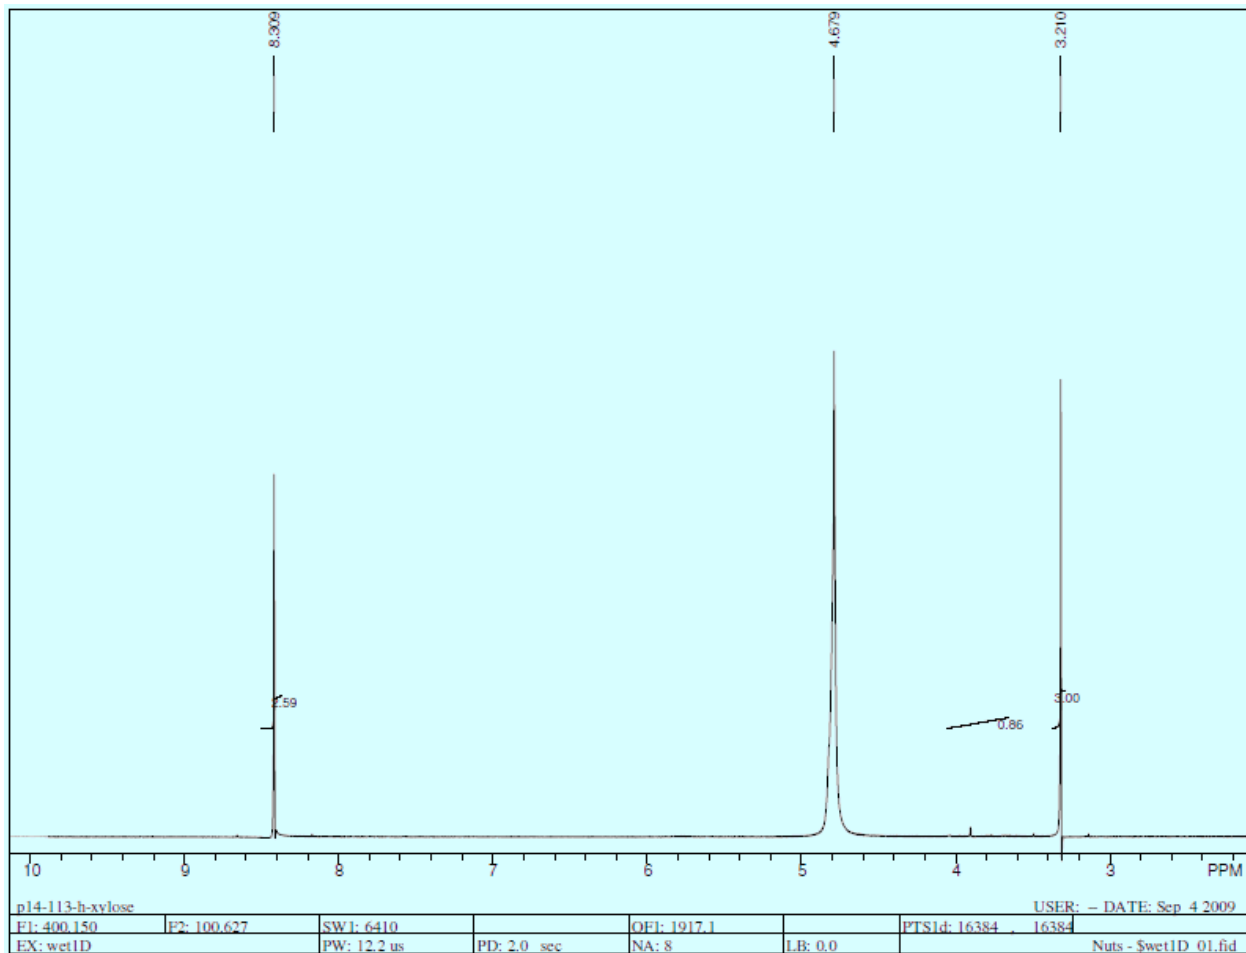

**<sup>1</sup>H wet 1D NMR of entry 3, Table 2.**

Ribose (0.033 mmole) 150  $\mu$ L H<sub>2</sub>O<sub>2</sub> and 30  $\mu$ L NH<sub>4</sub>OH at RT for 1 hr; 2  $\mu$ L of MeOH as standard was used for NMR. Formic acid observed was ~99%.

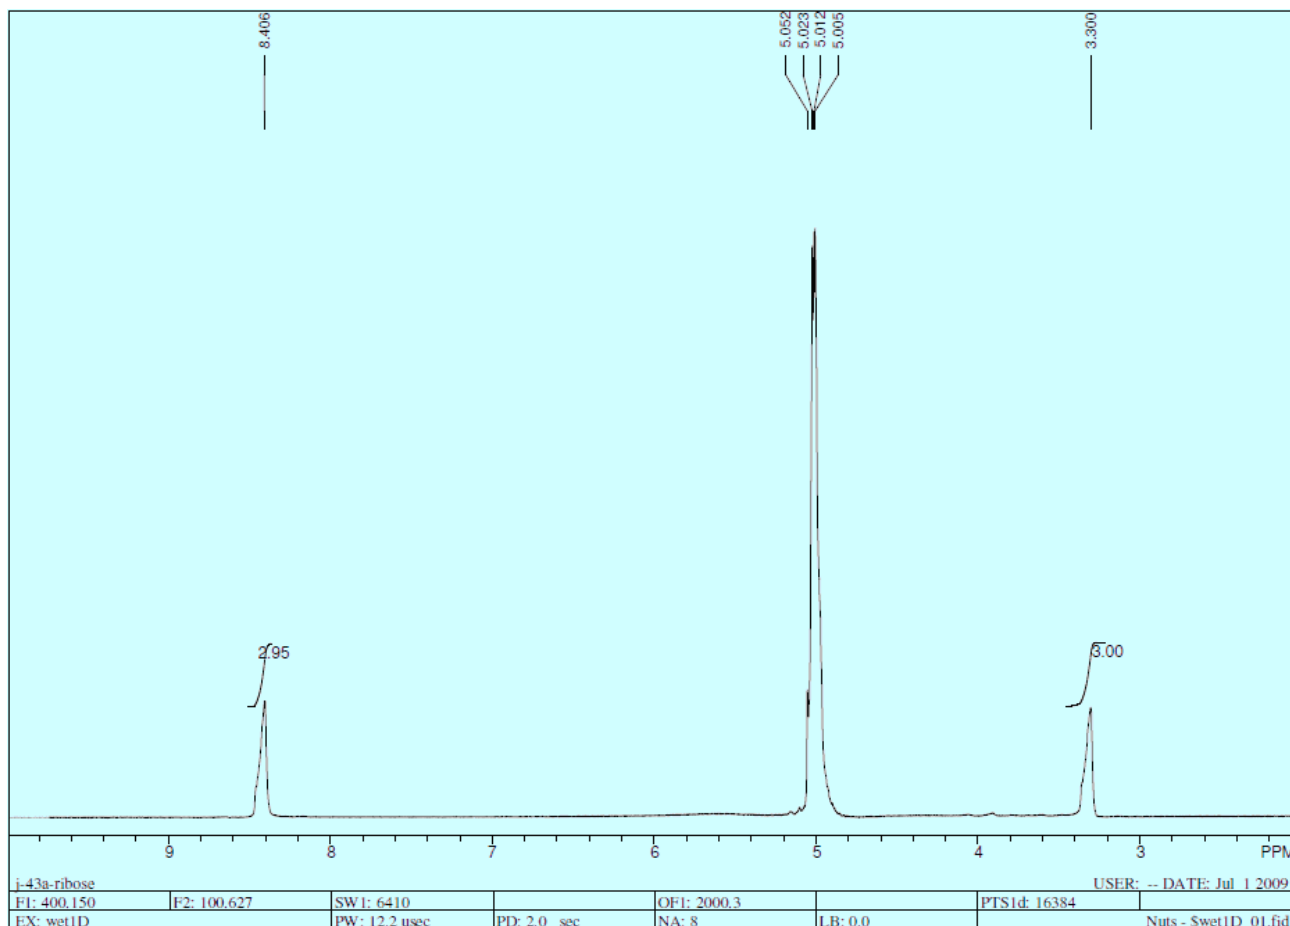

**<sup>1</sup>H wet 1D NMR of entry 4, Table 2 is same as the entry 5, Table 1**

# <sup>1</sup>H wet 1D NMR of entry 5, Table 2

Galactose (0.005gm, 0.028 mmol), 150  $\mu$ L H<sub>2</sub>O<sub>2</sub> and 30  $\mu$ L NH<sub>4</sub>OH at RT for 1 hr; 2  $\mu$ L of MeOH as standard was used for NMR. Formic acid observed was 93%

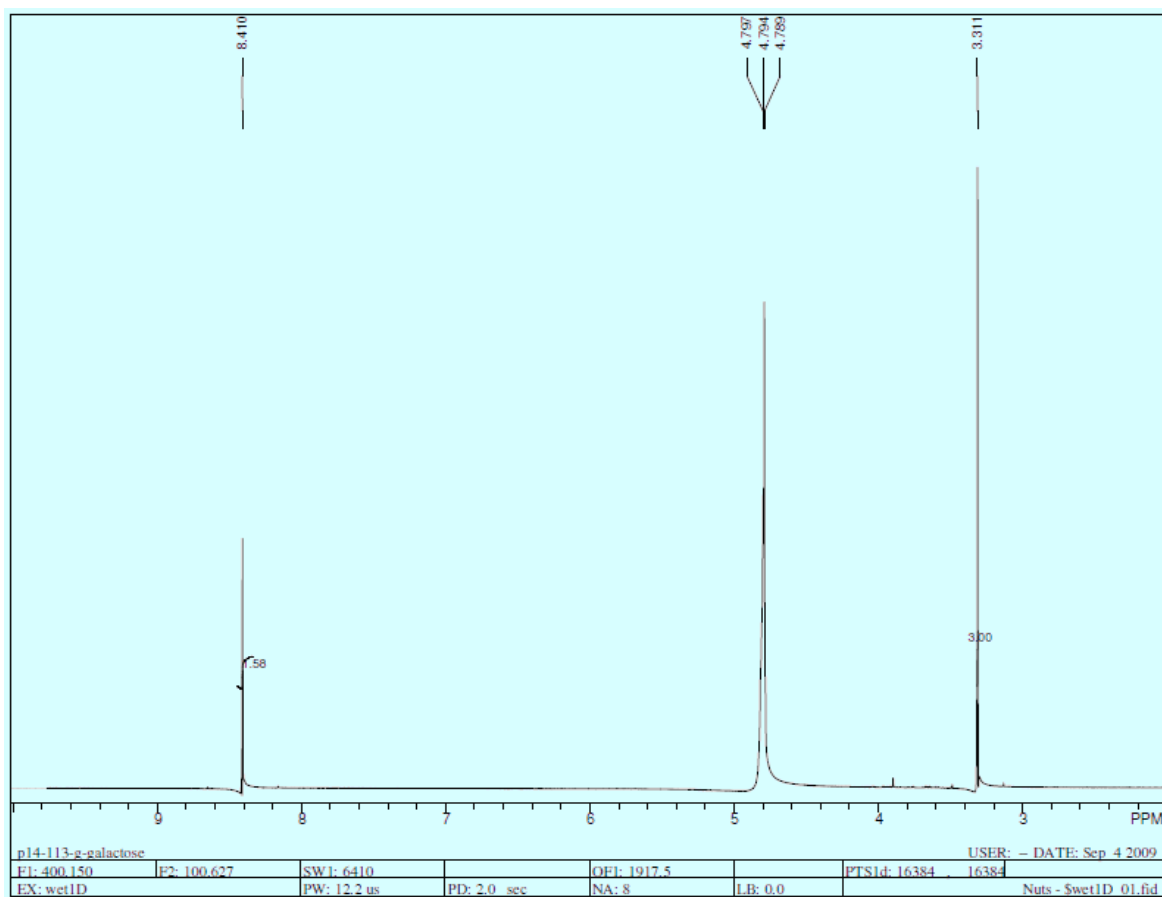

### <sup>1</sup>H wet 1D NMR of entry 6, Table 2

Dihydroxyacetone (0.005 gm, 0.056 mmol), 150 μL H<sub>2</sub>O<sub>2</sub> and 30 μL NH<sub>4</sub>OH at RT for 1 hr; 2 μL of MeOH as standard was used for NMR. Formic acid observed was ~99%

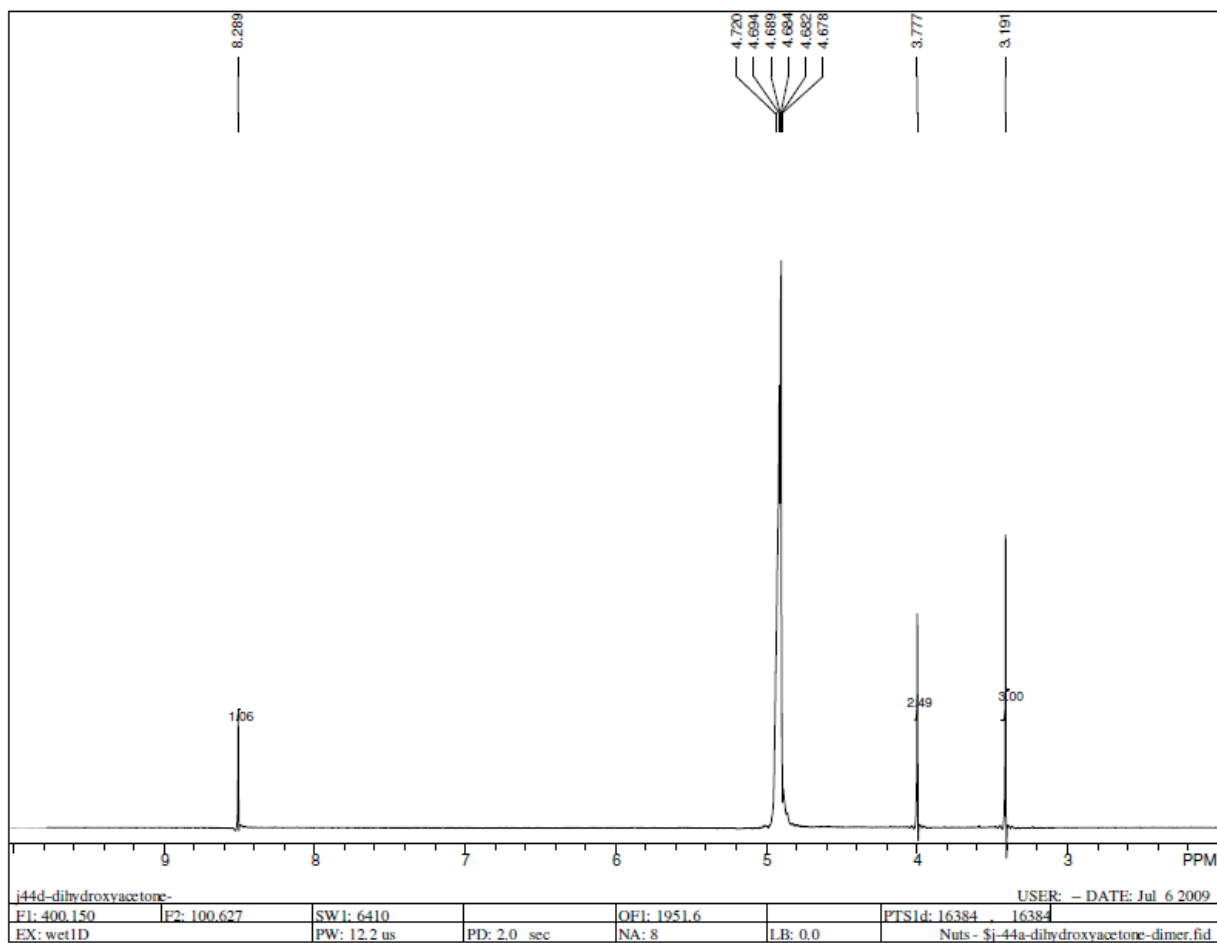

# <sup>1</sup>H wet 1D NMR of entry 7, Table 2

Tagatose (0.005 gm, 0.028 mmol) 150 μL H<sub>2</sub>O<sub>2</sub> and 30 μL NH<sub>4</sub>OH at RT for 1 hr; 2 μL of MeOH as standard was used for NMR. Formic acid observed was 83%.

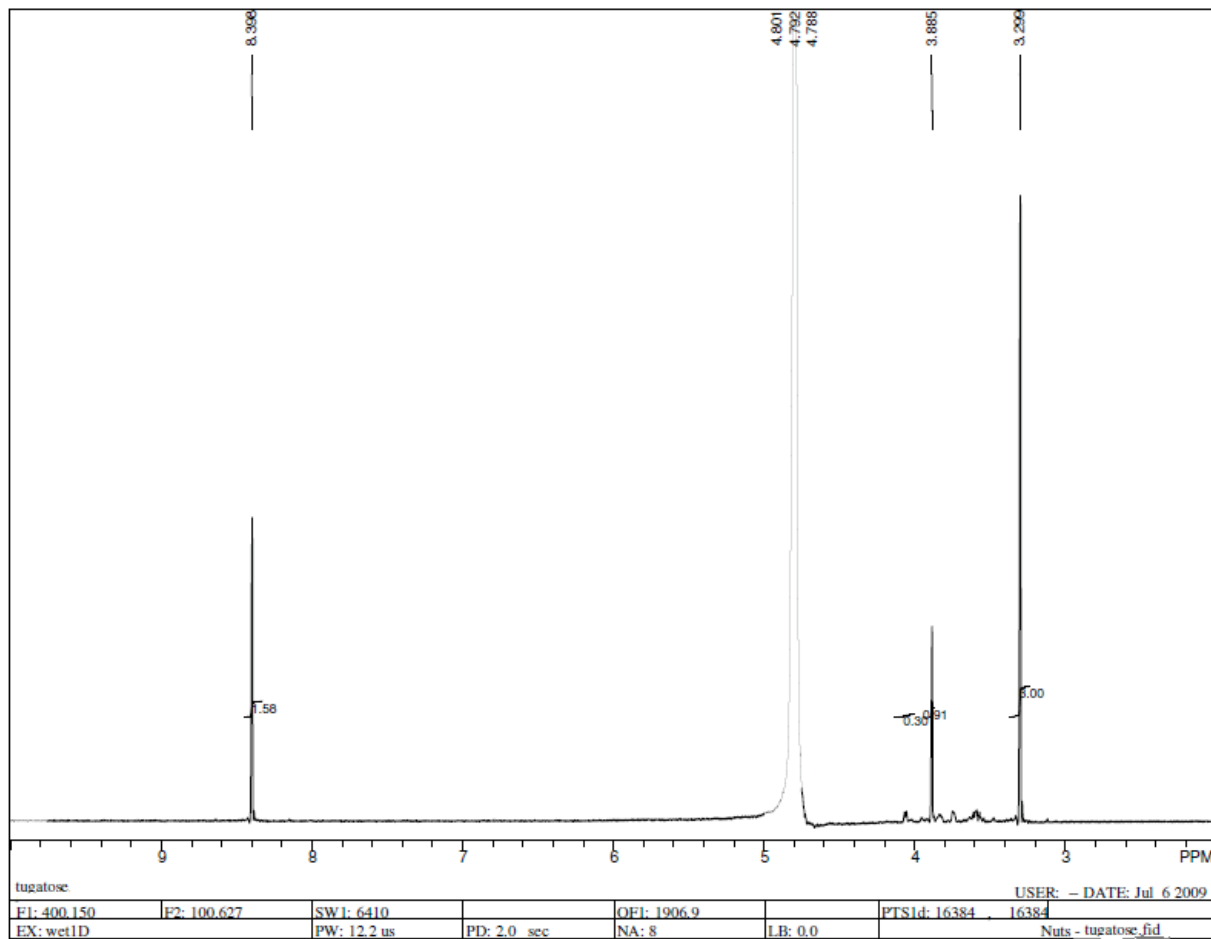

<sup>13</sup>C NMR of entry 7, Table 2

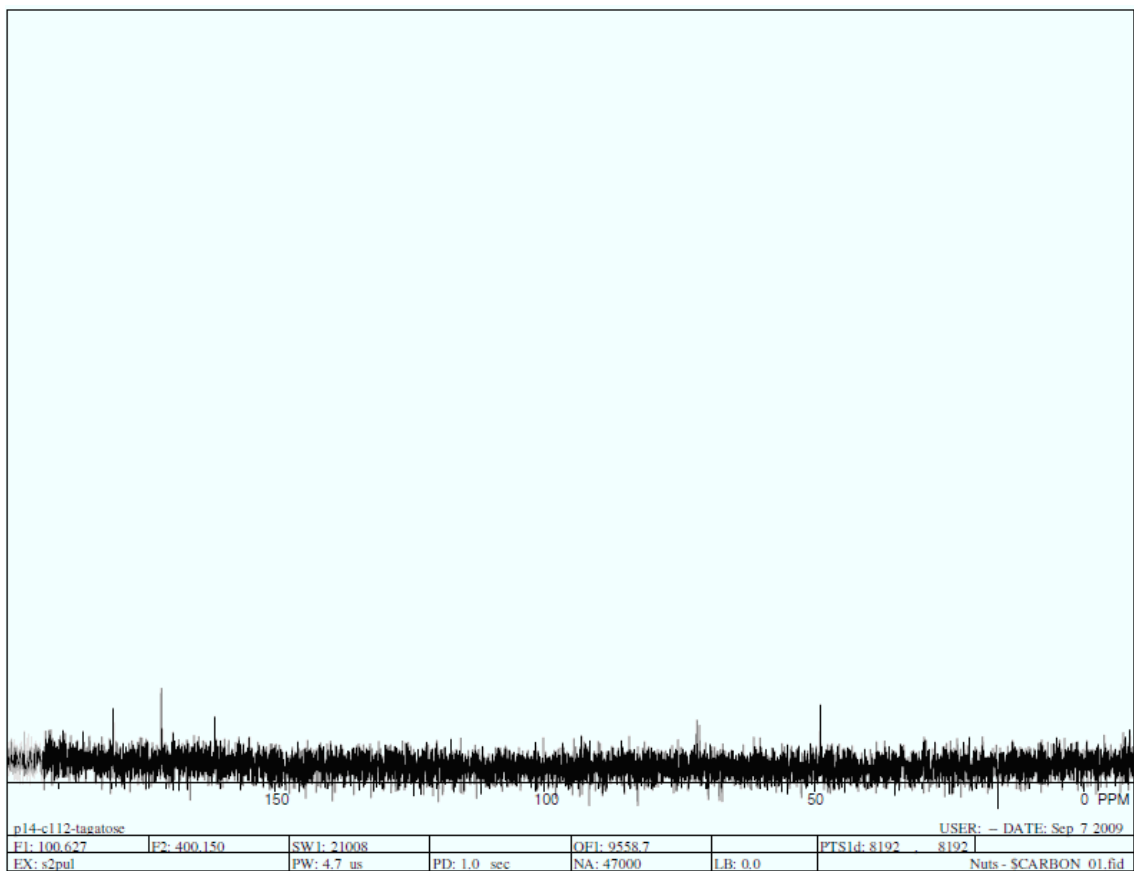

# <sup>1</sup>H wet 1D NMR of entry 8, Table 2

Fructose (0.005 gm, 0.28 mmol) 150 μL H<sub>2</sub>O<sub>2</sub> and 30 μL NH<sub>4</sub>OH at RT for 1 hr; 2 μL of MeOH as standard was used for NMR. Formic acid observed was 46%.

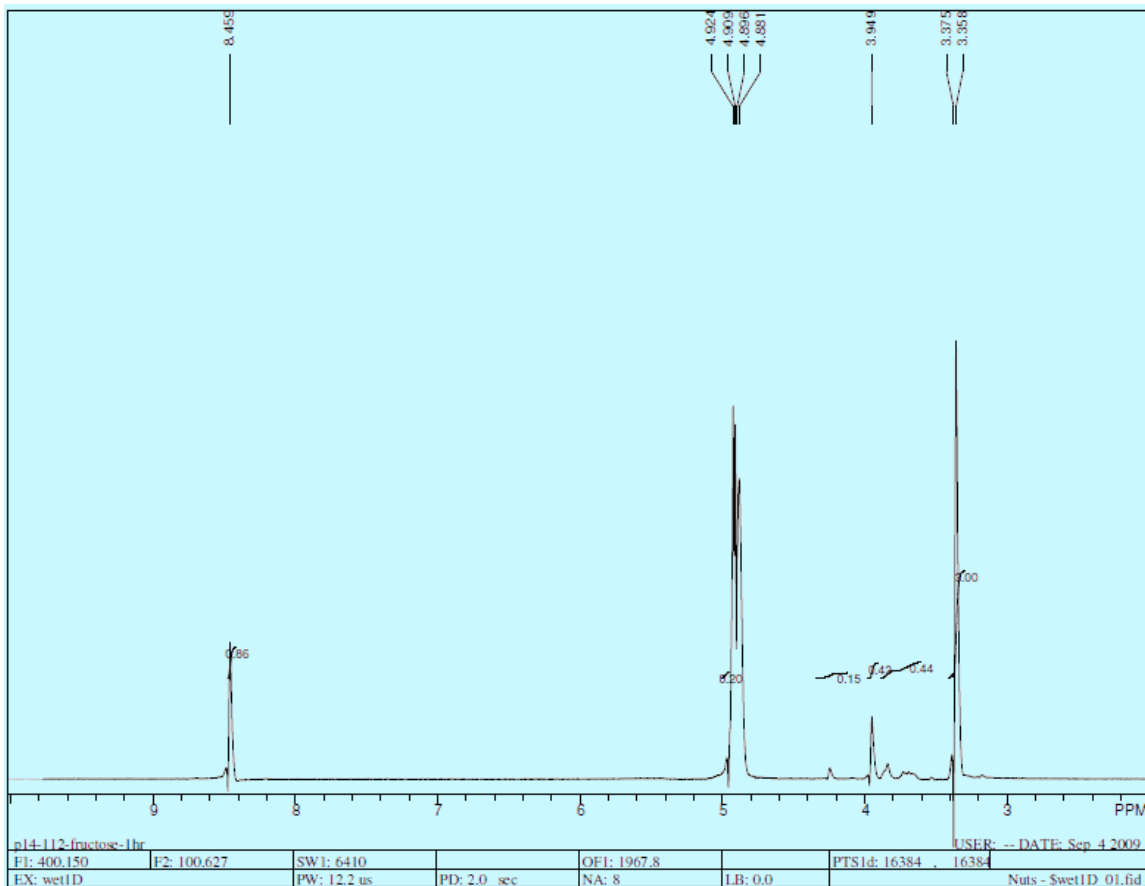



<sup>13</sup>C NMR of entry 8, Table 2.

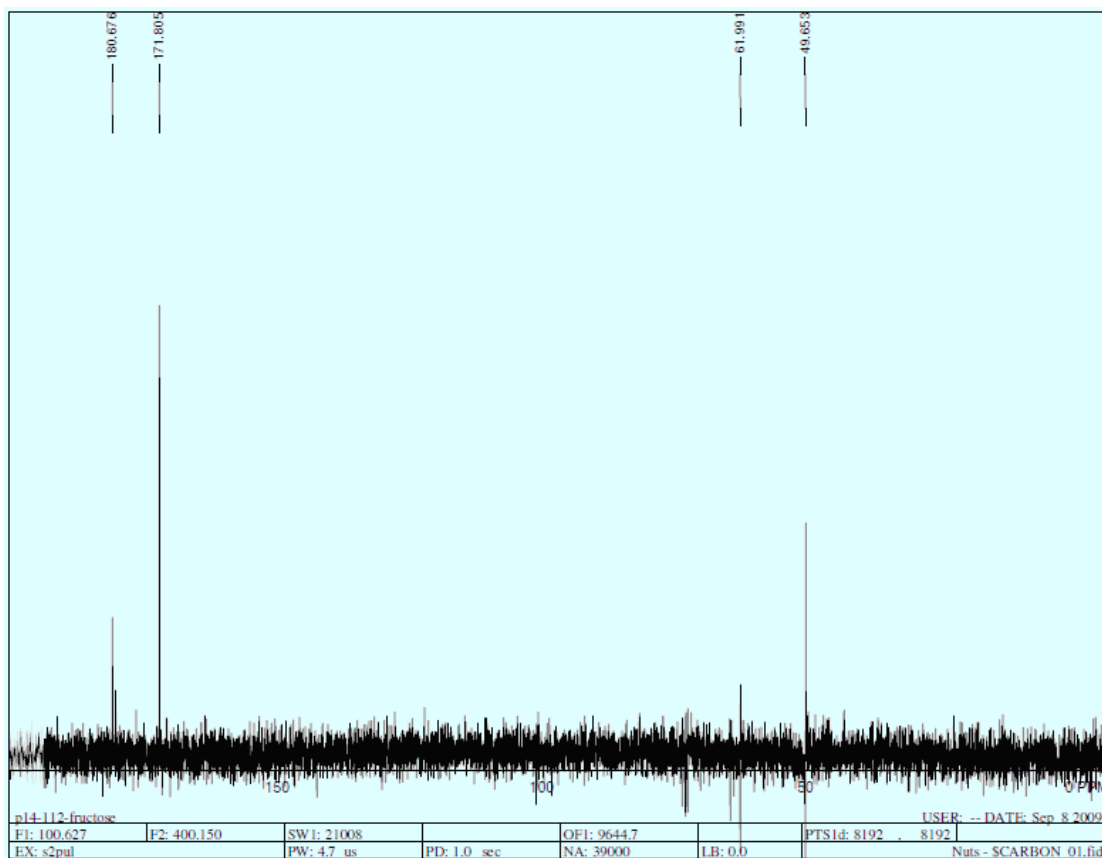

# <sup>1</sup>H wet 1D NMR of entry 9, Table 2

Sucrose (0.005gm, *mmol*), 150  $\mu$ L H<sub>2</sub>O<sub>2</sub> and 30  $\mu$ L NH<sub>4</sub>OH at RT for 1 hr; 2  $\mu$ L of MeOH as standard was used for NMR. Formic acid observed was 0%.

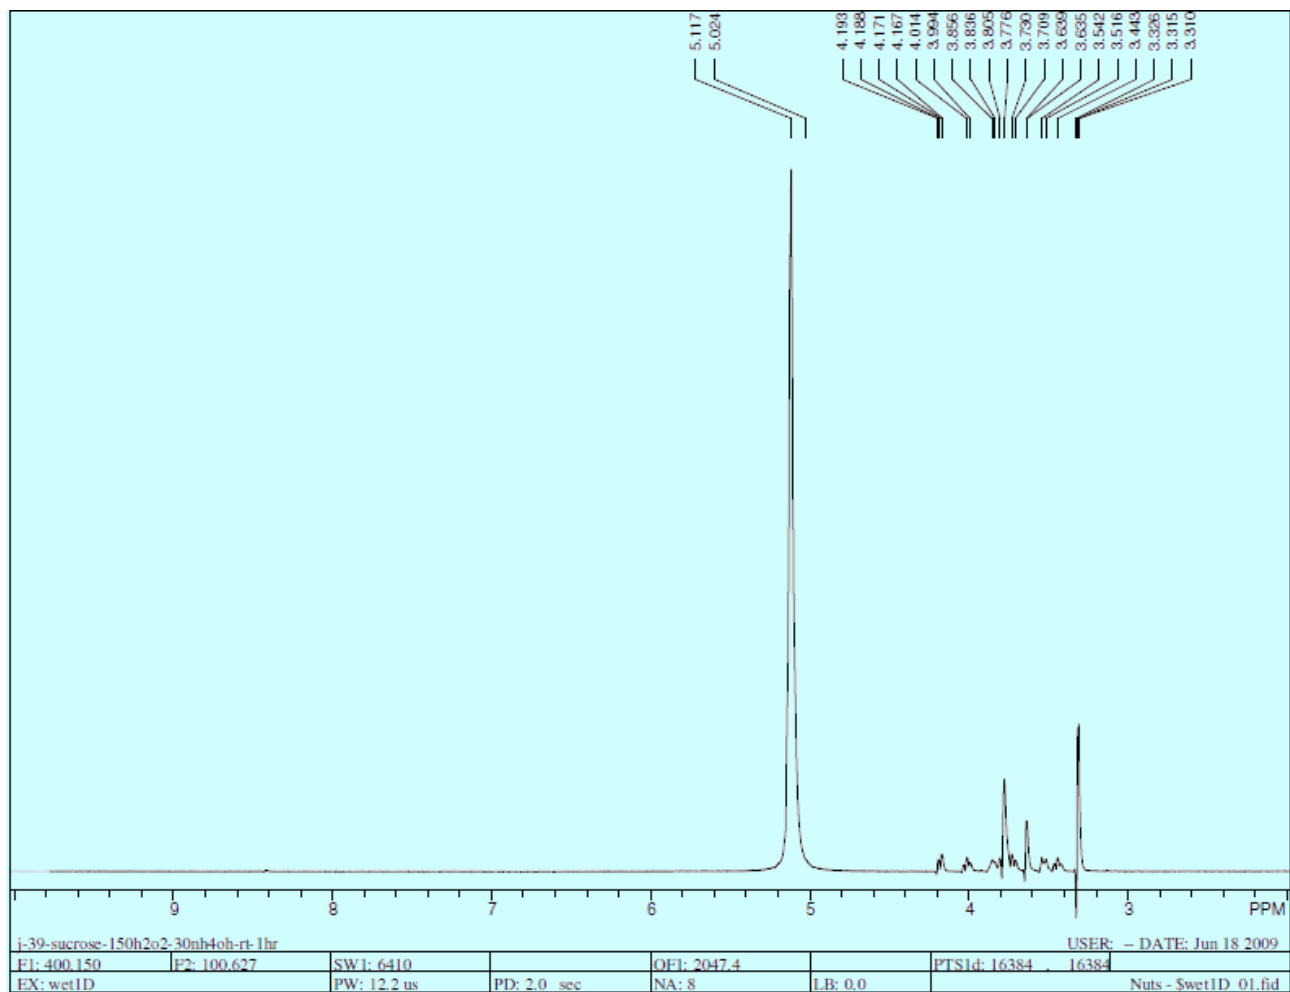

# <sup>1</sup>H wet 1D NMR of entry 10, Table 2.

$\alpha$ -D-Lactose (0.005 gm, 0.015 mmol), 150  $\mu$ L H<sub>2</sub>O<sub>2</sub> and 30  $\mu$ L NH<sub>4</sub>OH at RT for 24 hr; 2  $\mu$ L of MeOH as standard was used for NMR. Formic acid observed was 99%

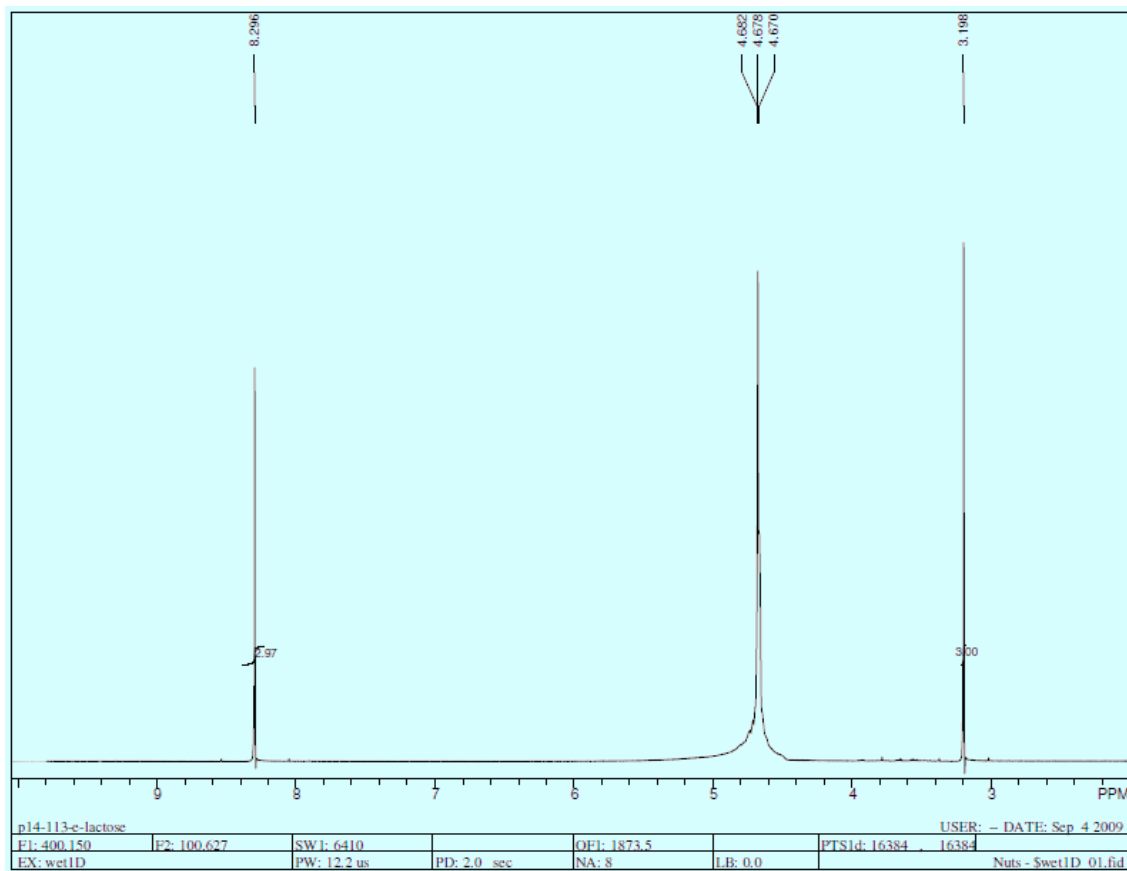

# <sup>1</sup>H wet 1D NMR of entry 11, Table 2.

Maltose (0.005 gm, 0.015 mmol), 150 μL H<sub>2</sub>O<sub>2</sub> and 30 μL NH<sub>4</sub>OH at RT for 24 hr; 2 μL of MeOH as standard was used for NMR. Formic acid observed was 99%.

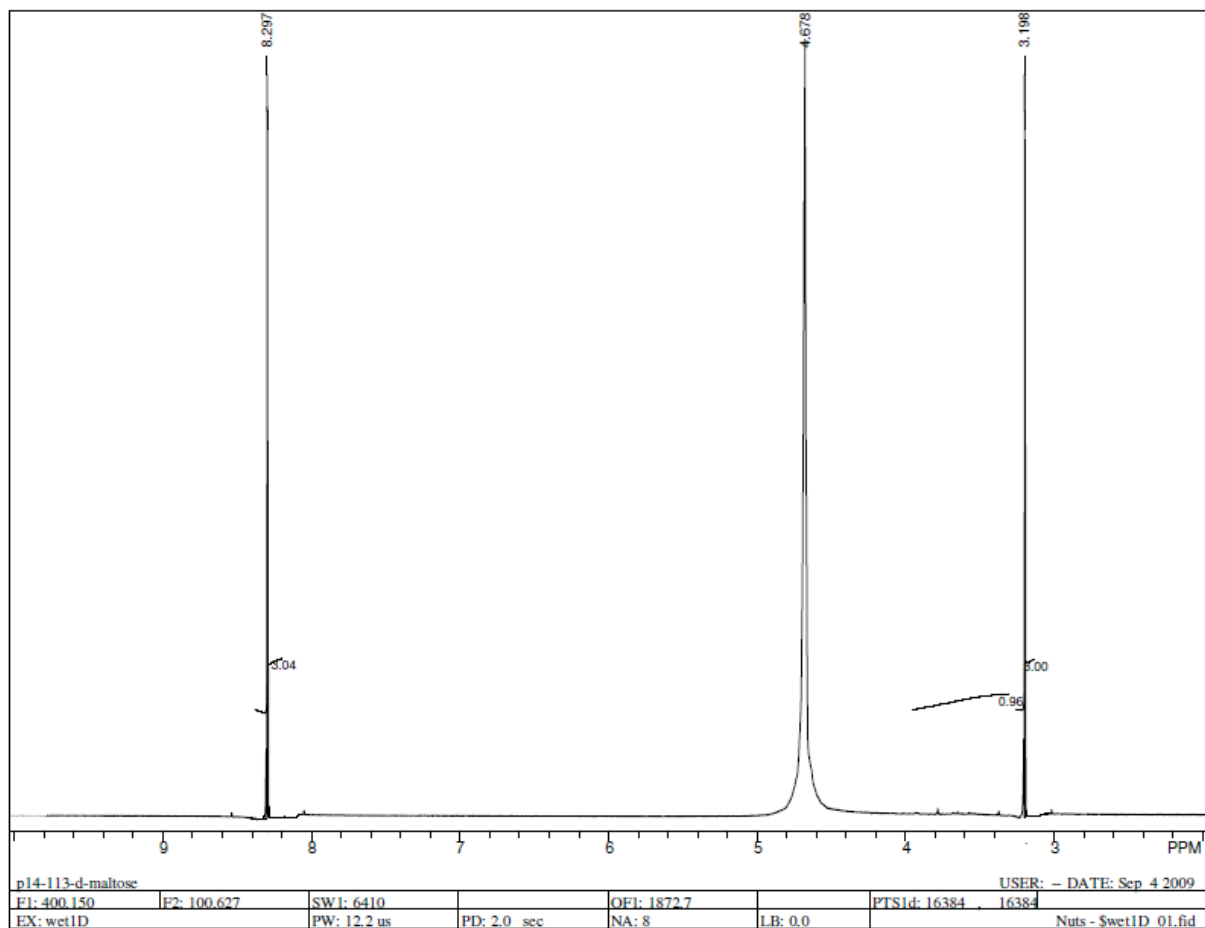

### <sup>1</sup>H wet 1D NMR of entry 12, Table 2.

Cellobiose (0.005 gm, 0.015 mmol), 150 μL H<sub>2</sub>O<sub>2</sub> and 30 μL NH<sub>4</sub>OH at RT for 24 hr; 2 μL of MeOH as standard was used for NMR. Formic acid observed was 70%.

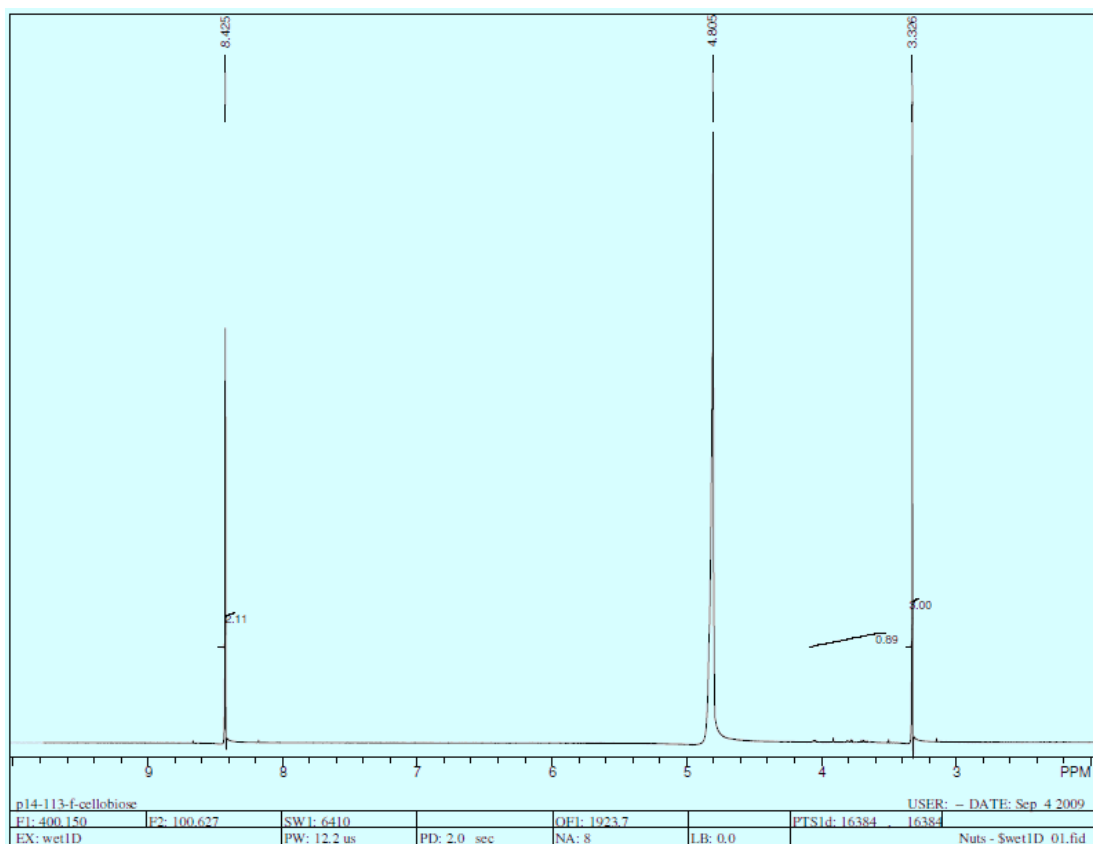

# <sup>1</sup>H wet 1D NMR of entry 13, Table 2

Raffinose (0.005 gm, 0.01 mmol) 150 μL H<sub>2</sub>O<sub>2</sub> and 30 μL NH<sub>4</sub>OH at RT for 24 hr; 2 μL of MeOH as standard was used for NMR. Formic acid observed was 0%.

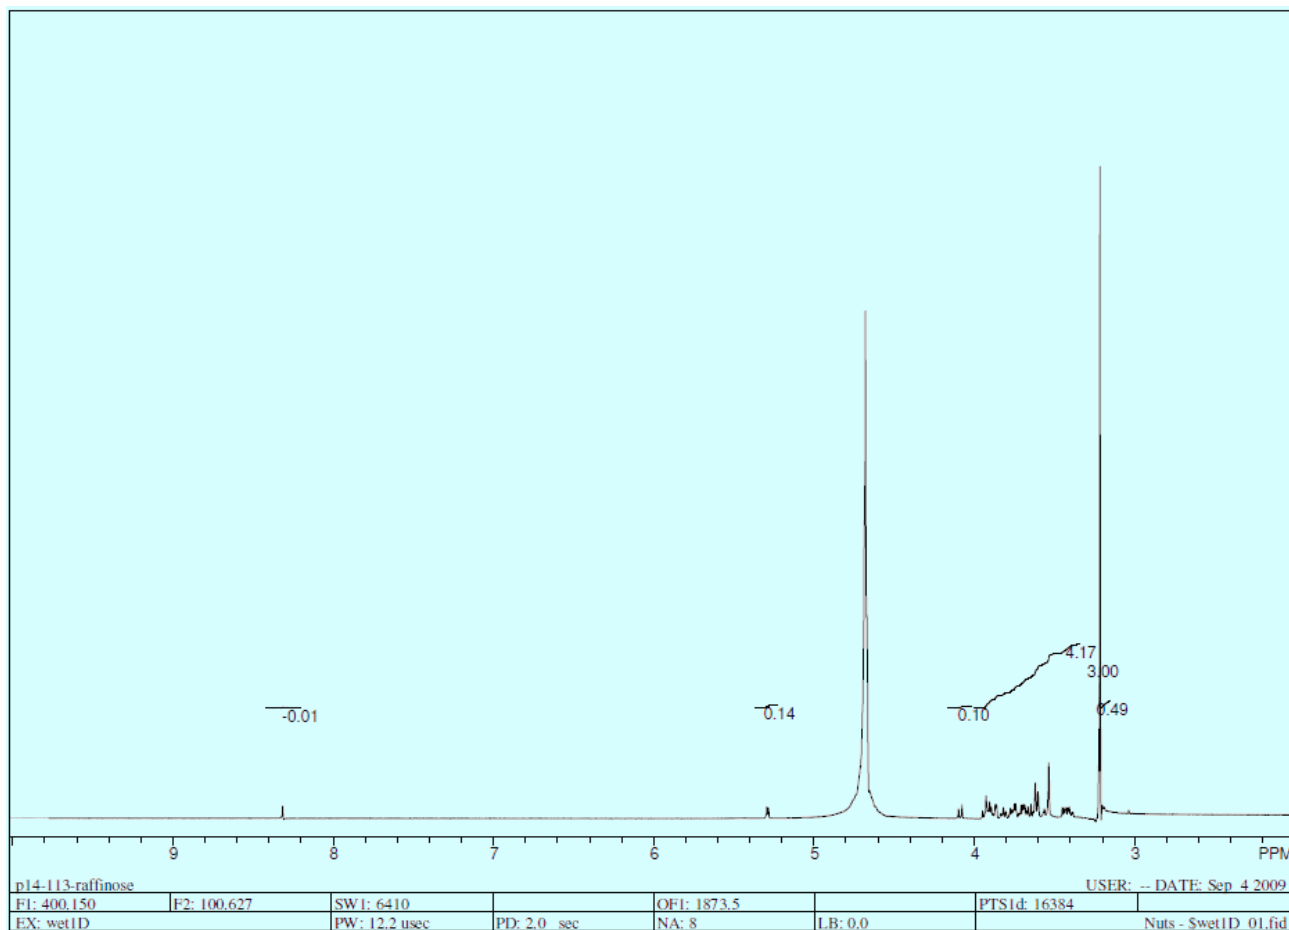

# <sup>1</sup>H wet 1D NMR of entry 14, Table 2

Melezitose (0.005 gm, 0.01 mmol) 150  $\mu$ L H<sub>2</sub>O<sub>2</sub> and 30  $\mu$ L NH<sub>4</sub>OH at RT for 24 hr; 2  $\mu$ L of MeOH as standard was used for NMR. Formic acid observed was 26%.

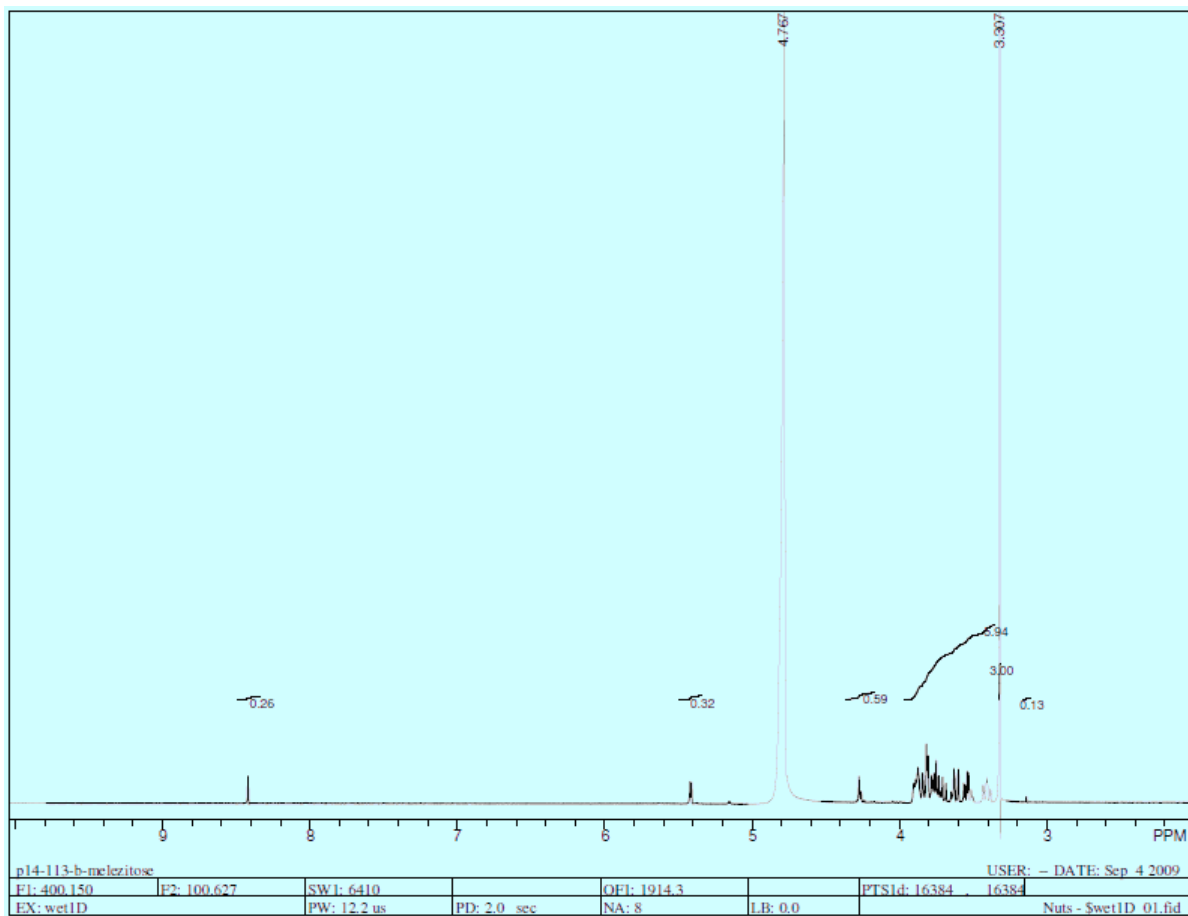

**<sup>1</sup>H wet 1D NMR of ammonium formate (10 mg, 1.59x10<sup>-4</sup> moles) (20 μL of solution was used for NMR as a methanol standard corresponding to 2μL MeOH from a solution of 20 μL methanol in 180 μL D<sub>2</sub>O mixture)**

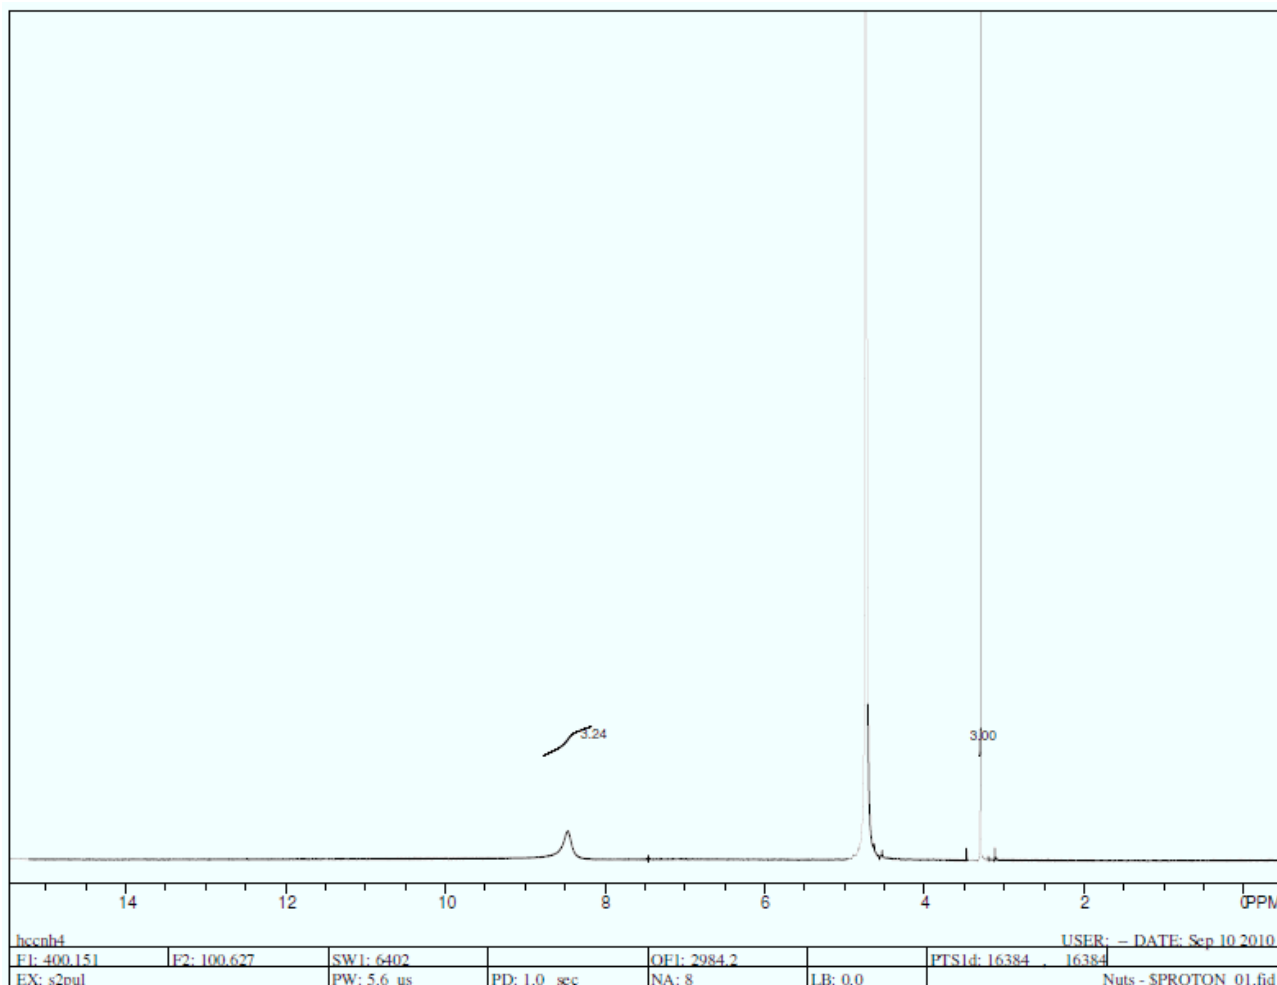



**$^1\text{H}$  NMR of mixture of formic acid (10  $\mu\text{L}$ ) and ammonium formate (6.9 mg,  $1.09 \times 10^{-3}$  moles)**

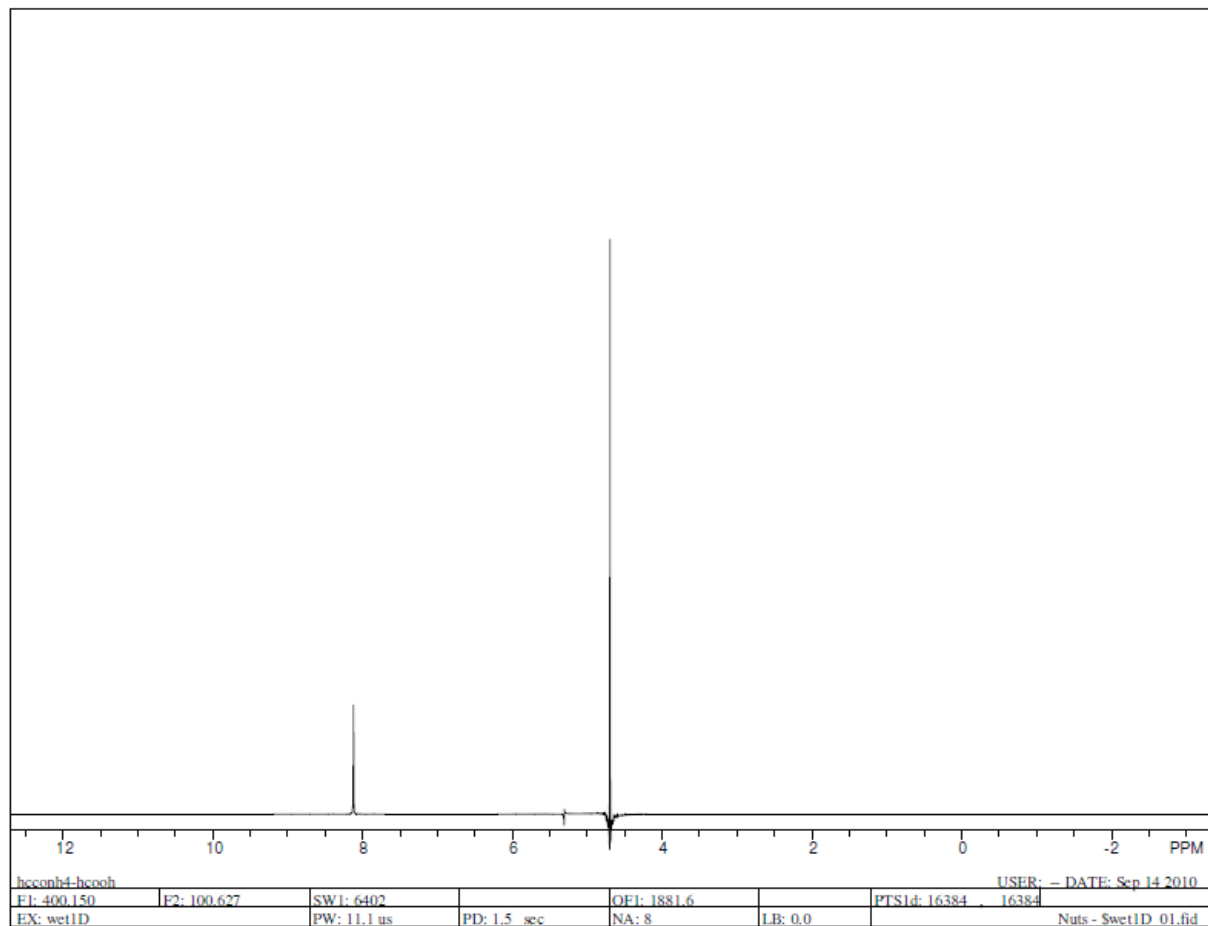

Supplement: NIHMS240920-supplement-01.pdf [file NIHMS240920-supplement-01.pdf]
